# Supplementary material
Source: HighWire-hosted journal article supplement (https://svn.smart01.highwire.org/content/svn-2023-002450)
Supplement: inline-supplementary-material-1 [file inline-supplementary-material-1.pdf]

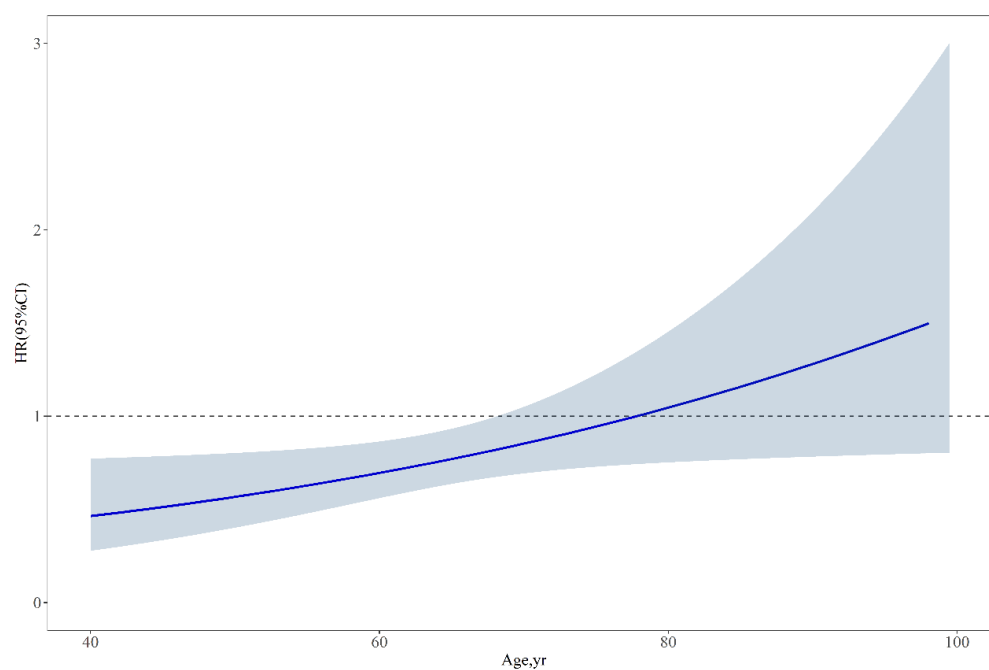

Appendix 1. Influence of age as a continuous variable on the effect of ticagrelor-aspirin versus clopidogrel-aspirin for stroke within 90 days. Shaded area represents 95% confidence intervals (CIs). Note: HR = hazard ratio.

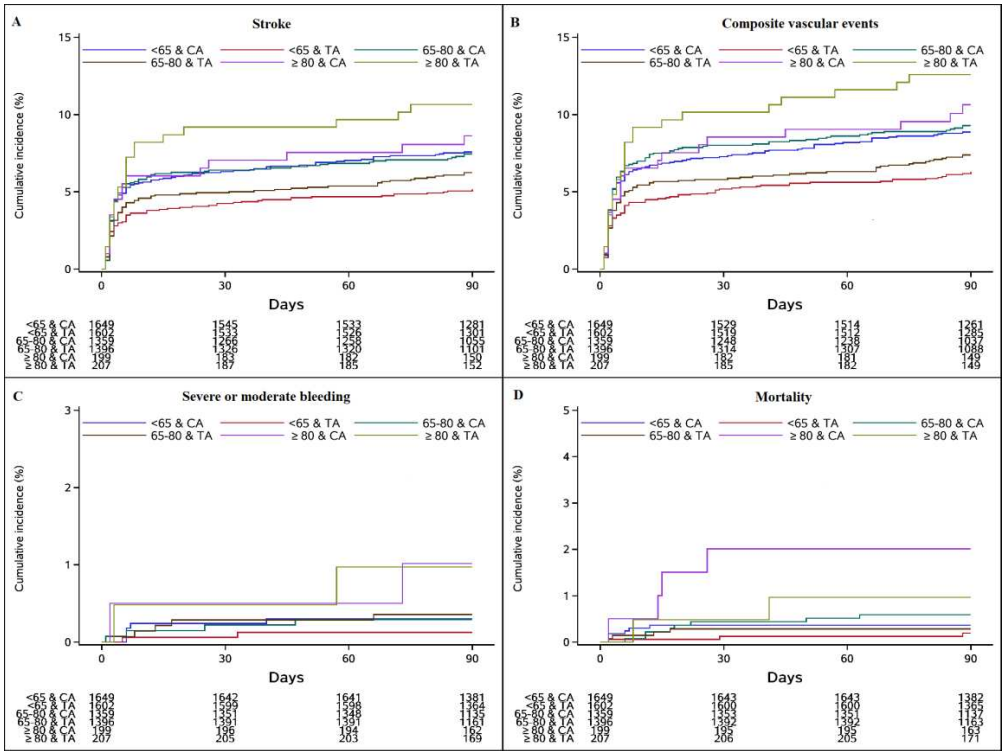

Appendix 2. Kaplan–Meier curves of the efficacy and safety outcomes in patients with different ages receiving different dual antiplatelet therapy.
